# Supplementary material for: Glycine-alanine dipeptide repeat protein contributes to toxicity in a zebrafish model of C9orf72 associated neurodegeneration
Source: PubMed Central journal article supplement (PMC5237533; doi:10.1186/s13024-016-0146-8), 2017-01-14

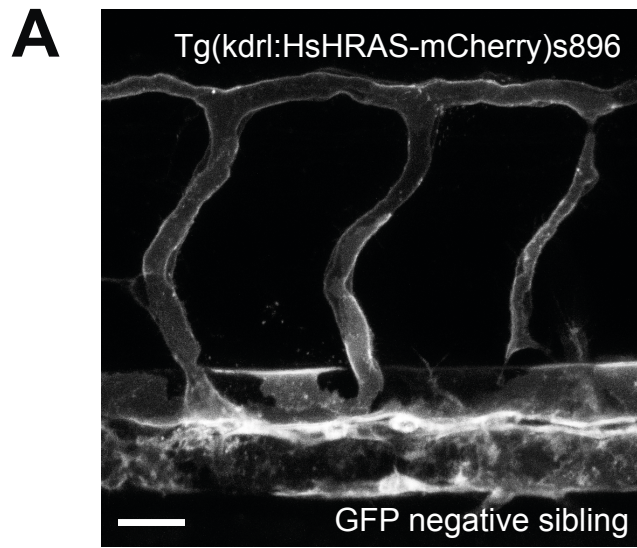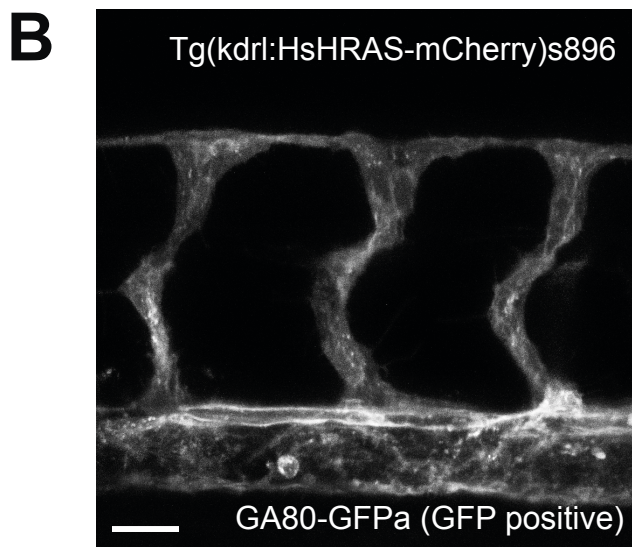

Supplement: 13024_2016_146_MOESM5_ESM.pdf [file 13024_2016_146_MOESM5_ESM.pdf]
