# Supplementary material for: Glycine-alanine dipeptide repeat protein contributes to toxicity in a zebrafish model of C9orf72 associated neurodegeneration
Source: Springer Nature journal article supplement (doi:10.1186/s13024-016-0146-8), 2017-01-14

**A**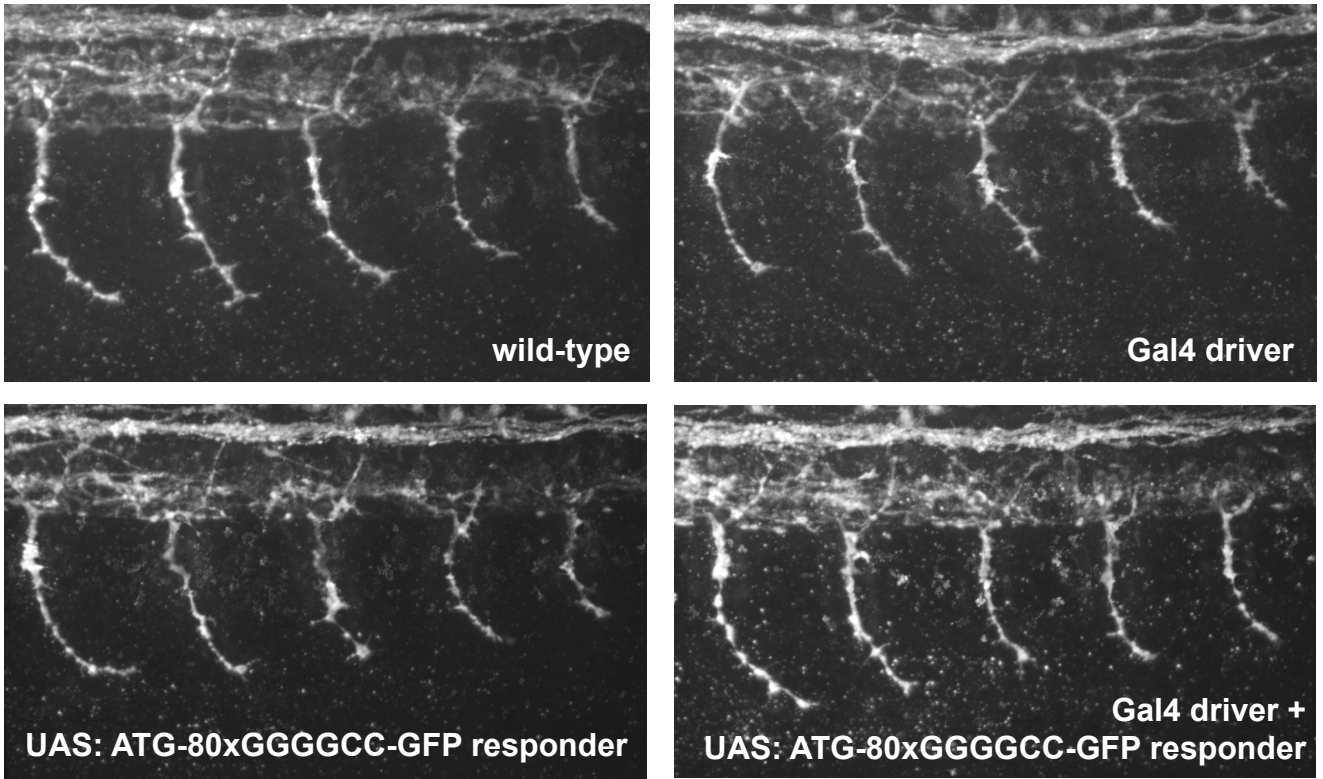**B**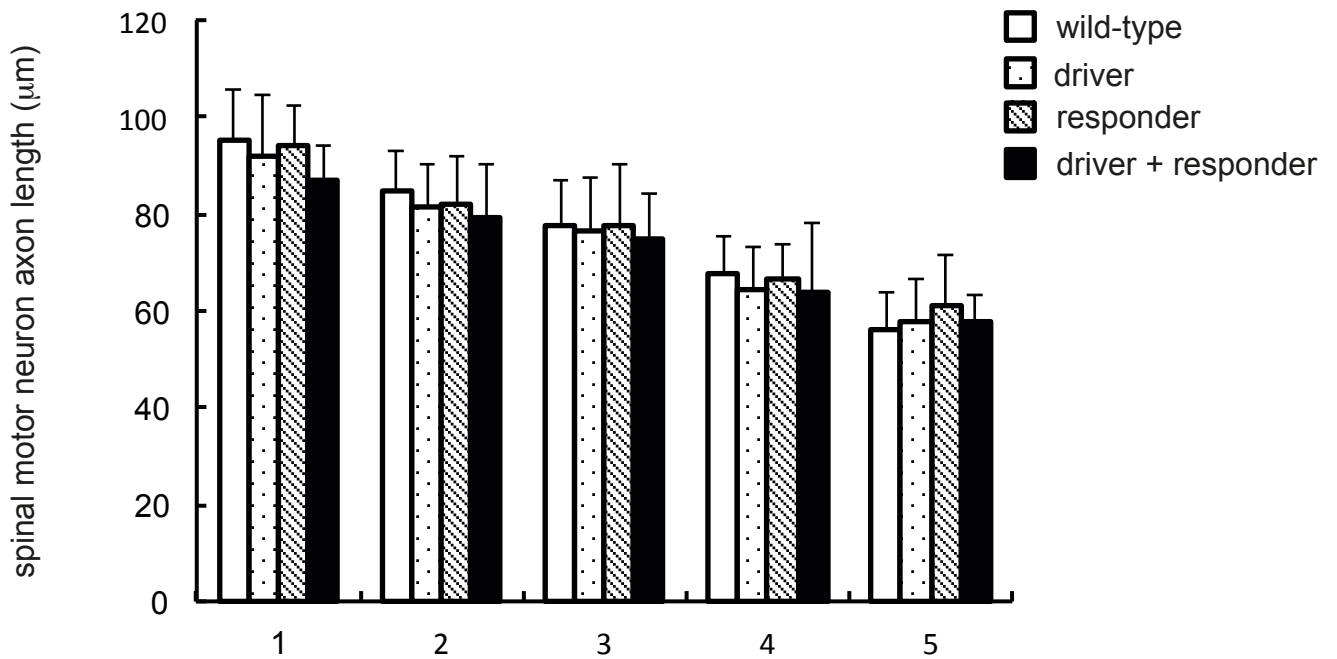

Supplement: MOESM2 [file 11999764]
