# Supplementary material for: Glycine-alanine dipeptide repeat protein contributes to toxicity in a zebrafish model of C9orf72 associated neurodegeneration
Source: Springer Nature journal article supplement (doi:10.1186/s13024-016-0146-8), 2017-01-14

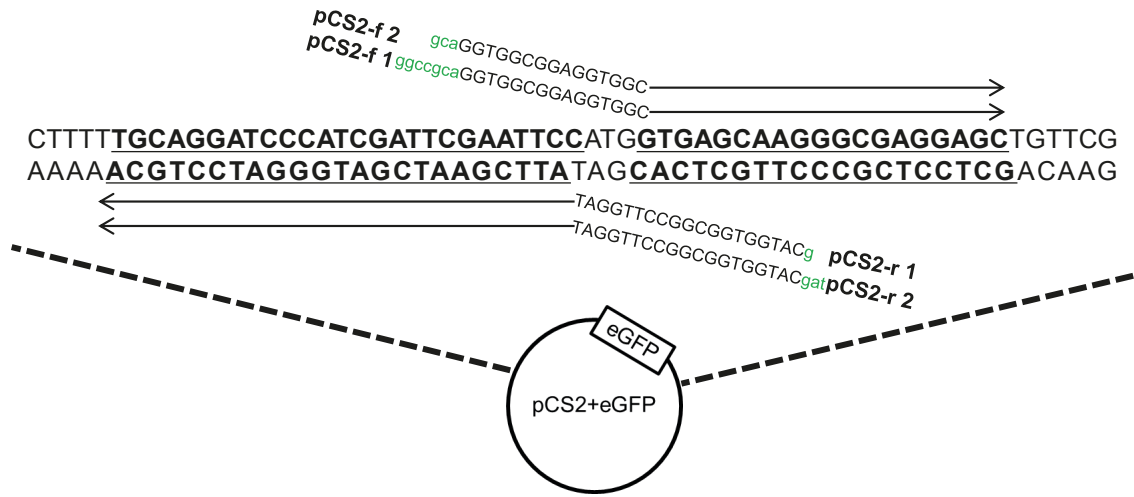

PCR product (pCS1-f 1/pCS2-r 1) XXXGAAAAACGTCCTAGGGTAGCTAAGCTTAAAGGATCCAAGGCCGCCACCATG*c* *ggcgcgca*GGTGGCGGAGGTGGCGTGAGCAAGGGCGAGGAGCTGTTCCXXX  
 XXXCTTTTTGCAGGATCCCATCGATTTCGAATTCCATAGGTTCCGGCGGTGGTAC*g* *ccggcgct*CCACCGCTCCACCGCACTCGTTCCCGCTCCTCGACAAGXXX

PCR product (pCS1-f 2/pCS2-r 2) XXXGAAAAACGTCCTAGGGTAGCTAAGCTTAAAGGATCCAAGGCCGCCACCATG*c**ta* *gca*GGTGGCGGAGGTGGCGTGAGCAAGGGCGAGGAGCTGTTCCXXX  
 XXXCTTTTTGCAGGATCCCATCGATTTCGAATTCCATAGGTTCCGGCGGTGGTAC*gat* *cg*tCCACCGCTCCACCGCACTCGTTCCCGCTCCTCGACAAGXXX

denaturation and annealing

Bfal /NotI digested sticky end

XXXGAAAAACGTCCTAGGGTAGCTAAGCTTAAAGGATCCAAGGCCGCCACCATG*c* *ggcgcgca*GGTGGCGGAGGTGGCGTGAGCAAGGGCGAGGAGCTGTTCCXXX  
 XXXCTTTTTGCAGGATCCCATCGATTTCGAATTCCATAGGTTCCGGCGGTGGTAC*gat* *cg*tCCACCGCTCCACCGCACTCGTTCCCGCTCCTCGACAAGXXX

ligation

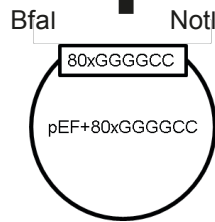

Supplement: MOESM7 [file 11999764]
